# Supplementary material for: GBM-associated mutations and altered protein expression are more common in young patients
Source: PubMed Central journal article supplement (PMC5342491; doi:10.18632/oncotarget.11617), 2016-08-25
Supplement: oncotarget-07-69466-s001.pdf [file oncotarget-07-69466-s001.pdf]

## GBM-associated mutations and altered protein expression are more common in young patients

### Supplementary Materials

Supplementary Table S1: EGFR expression and p53 mutation frequency in young and elderly patients

| Age Group    | EGFR expression      | p53 mutation         |
|--------------|----------------------|----------------------|
| <i>Old</i>   | 45% ( <i>n</i> = 42) | 26% ( <i>n</i> = 25) |
| <i>Young</i> | 55% ( <i>n</i> = 51) | 57% ( <i>n</i> = 56) |
|              | <i>p</i> = NS        | <i>p</i> < 0.0001    |
